# Supplementary material for: Yeast as a Model to Unravel New BRCA2 Functions in Cell Metabolism
Source: Front Oncol. 2022 Jun 6;12:908442. doi: 10.3389/fonc.2022.908442 (PMC9207209; doi:10.3389/fonc.2022.908442)
Supplement: Supplementary file 5 [file Table_1.xlsx]

## Sheet: BP
Analysis Type:	PANTHER Overrepresentation Test (Released 20200728)
Annotation Version and Release Date:	GO Ontology database DOI: 10.5281/zenodo.4033054 Released 2020-09-10
Analyzed List:	ALL_verified.txt (Saccharomyces cerevisiae)
Reference List:	background_ref_only_verified.txt (Saccharomyces cerevisiae)
Test Type:	FISHER
Correction:	FDR
GO biological process complete	background_ref_only_verified.txt - REFLIST (5113)	ALL_verified.txt (1297)	ALL_verified.txt (expected)	ALL_verified.txt (over/under)	ALL_verified.txt (fold Enrichment)	ALL_verified.txt (raw P-value)	ALL_verified.txt (FDR)
translational termination (GO:0006415)	148	128	37.54	+	3.41	1.29E-23	6.79E-20
cytoplasmic translation (GO:0002181)	172	136	43.63	+	3.12	1.82E-22	4.78E-19
cellular protein complex disassembly (GO:0043624)	168	132	42.62	+	3.10	1.17E-21	2.05E-18
ribosomal large subunit assembly (GO:0000027)	43	30	10.91	+	2.75	4.65E-05	5.10E-03
protein-containing complex disassembly (GO:0032984)	198	135	50.23	+	2.69	2.97E-18	2.23E-15
ribosome assembly (GO:0042255)	79	51	20.04	+	2.54	6.70E-07	1.41E-04
ribosomal large subunit biogenesis (GO:0042273)	127	80	32.22	+	2.48	5.70E-10	2.31E-07
maturation of SSU-rRNA from tricistronic rRNA transcript (SSU-rRNA, 5.8S rRNA, LSU-rRNA) (GO:0000462)	104	65	26.38	+	2.46	3.04E-08	7.61E-06
maturation of SSU-rRNA (GO:0030490)	116	70	29.43	+	2.38	2.62E-08	6.89E-06
maturation of LSU-rRNA (GO:0000470)	62	37	15.73	+	2.35	7.02E-05	6.83E-03
endonucleolytic cleavage in ITS1 to separate SSU-rRNA from 5.8S rRNA and LSU-rRNA from tricistronic rRNA transcript (SSU-rRNA, 5.8S rRNA, LSU-rRNA) (GO:0000447)	44	26	11.16	+	2.33	8.90E-04	4.21E-02
ribosomal small subunit biogenesis (GO:0042274)	143	84	36.27	+	2.32	3.37E-09	1.11E-06
maturation of LSU-rRNA from tricistronic rRNA transcript (SSU-rRNA, 5.8S rRNA, LSU-rRNA) (GO:0000463)	52	30	13.19	+	2.27	7.26E-04	3.60E-02
cellular component disassembly (GO:0022411)	262	150	66.46	+	2.26	3.55E-15	2.07E-12
endonucleolytic cleavage of tricistronic rRNA transcript (SSU-rRNA, 5.8S rRNA, LSU-rRNA) (GO:0000479)	58	33	14.71	+	2.24	3.28E-04	1.94E-02
endonucleolytic cleavage involved in rRNA processing (GO:0000478)	58	33	14.71	+	2.24	3.28E-04	1.92E-02
peptide biosynthetic process (GO:0043043)	366	205	92.84	+	2.21	5.63E-20	7.40E-17
translation (GO:0006412)	362	202	91.83	+	2.20	1.63E-19	1.71E-16
rRNA-containing ribonucleoprotein complex export from nucleus (GO:0071428)	66	36	16.74	+	2.15	4.12E-04	2.26E-02
amide biosynthetic process (GO:0043604)	415	218	105.27	+	2.07	1.12E-18	9.84E-16
peptide metabolic process (GO:0006518)	399	209	101.21	+	2.06	8.02E-18	5.27E-15
rRNA modification (GO:0000154)	76	39	19.28	+	2.02	5.84E-04	3.07E-02
ribosome biogenesis (GO:0042254)	394	195	99.94	+	1.95	1.13E-14	5.96E-12
maturation of 5.8S rRNA from tricistronic rRNA transcript (SSU-rRNA, 5.8S rRNA, LSU-rRNA) (GO:0000466)	91	45	23.08	+	1.95	3.41E-04	1.97E-02
maturation of 5.8S rRNA (GO:0000460)	91	45	23.08	+	1.95	3.41E-04	1.95E-02
cleavage involved in rRNA processing (GO:0000469)	82	40	20.80	+	1.92	9.09E-04	4.26E-02
rRNA processing (GO:0006364)	281	136	71.28	+	1.91	6.92E-10	2.60E-07
cellular amide metabolic process (GO:0043603)	482	225	122.27	+	1.84	1.22E-14	5.83E-12
rRNA metabolic process (GO:0016072)	297	138	75.34	+	1.83	4.64E-09	1.43E-06
ribonucleoprotein complex biogenesis (GO:0022613)	477	208	121.00	+	1.72	2.32E-11	1.02E-08
organelle assembly (GO:0070925)	168	72	42.62	+	1.69	2.87E-04	1.73E-02
generation of precursor metabolites and energy (GO:0006091)	199	79	50.48	+	1.56	9.77E-04	4.50E-02
ncRNA processing (GO:0034470)	402	153	101.97	+	1.50	1.51E-05	2.33E-03
organonitrogen compound biosynthetic process (GO:1901566)	851	311	215.87	+	1.44	2.68E-09	9.39E-07
ncRNA metabolic process (GO:0034660)	460	164	116.69	+	1.41	1.24E-04	9.75E-03
cellular macromolecule biosynthetic process (GO:0034645)	894	318	226.78	+	1.40	1.99E-08	5.81E-06
cellular nitrogen compound biosynthetic process (GO:0044271)	877	311	222.47	+	1.40	3.90E-08	8.91E-06
macromolecule biosynthetic process (GO:0009059)	911	321	231.09	+	1.39	3.14E-08	7.49E-06
protein-containing complex subunit organization (GO:0043933)	702	232	178.07	+	1.30	2.11E-04	1.44E-02
cellular biosynthetic process (GO:0044249)	1389	442	352.34	+	1.25	1.19E-06	2.24E-04
organic substance biosynthetic process (GO:1901576)	1434	456	363.76	+	1.25	7.46E-07	1.51E-04
biosynthetic process (GO:0009058)	1449	459	367.56	+	1.25	9.57E-07	1.86E-04
cellular nitrogen compound metabolic process (GO:0034641)	1798	543	456.09	+	1.19	9.56E-06	1.62E-03
regulation of cellular process (GO:0050794)	1585	334	402.06	-	.83	2.14E-04	1.44E-02
regulation of biological process (GO:0050789)	1683	354	426.92	-	.83	9.31E-05	8.59E-03
biological regulation (GO:0065007)	2032	426	515.45	-	.83	4.75E-06	8.32E-04
establishment of localization (GO:0051234)	1299	271	329.51	-	.82	6.76E-04	3.45E-02
localization (GO:0051179)	1471	305	373.14	-	.82	1.51E-04	1.09E-02
regulation of metabolic process (GO:0019222)	1197	248	303.64	-	.82	9.22E-04	4.29E-02
regulation of macromolecule metabolic process (GO:0060255)	1123	230	284.87	-	.81	7.95E-04	3.87E-02
regulation of primary metabolic process (GO:0080090)	1065	218	270.16	-	.81	1.10E-03	4.89E-02
transport (GO:0006810)	1258	256	319.11	-	.80	2.16E-04	1.42E-02
regulation of nitrogen compound metabolic process (GO:0051171)	1032	208	261.78	-	.79	7.05E-04	3.53E-02
regulation of macromolecule biosynthetic process (GO:0010556)	811	159	205.72	-	.77	1.13E-03	4.94E-02
positive regulation of biological process (GO:0048518)	807	158	204.71	-	.77	1.10E-03	4.86E-02
cellular catabolic process (GO:0044248)	748	144	189.74	-	.76	8.82E-04	4.22E-02
cellular protein localization (GO:0034613)	699	133	177.31	-	.75	1.01E-03	4.60E-02
regulation of gene expression (GO:0010468)	860	163	218.15	-	.75	1.55E-04	1.10E-02
cellular macromolecule localization (GO:0070727)	720	135	182.64	-	.74	4.24E-04	2.30E-02
nitrogen compound transport (GO:0071705)	826	153	209.53	-	.73	8.18E-05	7.68E-03
macromolecule localization (GO:0033036)	928	171	235.40	-	.73	1.73E-05	2.53E-03
protein localization (GO:0008104)	839	154	212.83	-	.72	4.34E-05	4.85E-03
protein modification process (GO:0036211)	714	129	181.12	-	.71	1.08E-04	9.33E-03
cellular protein modification process (GO:0006464)	714	129	181.12	-	.71	1.08E-04	9.18E-03
regulation of nucleobase-containing compound metabolic process (GO:0019219)	723	130	183.40	-	.71	6.71E-05	6.78E-03
regulation of RNA metabolic process (GO:0051252)	663	118	168.18	-	.70	1.15E-04	9.56E-03
establishment of localization in cell (GO:0051649)	708	126	179.60	-	.70	5.64E-05	5.93E-03
cellular localization (GO:0051641)	944	168	239.46	-	.70	1.83E-06	3.31E-04
establishment of protein localization (GO:0045184)	693	123	175.79	-	.70	5.91E-05	6.09E-03
amide transport (GO:0042886)	691	122	175.28	-	.70	4.73E-05	5.07E-03
regulation of RNA biosynthetic process (GO:2001141)	619	109	157.02	-	.69	1.29E-04	9.83E-03
regulation of nucleic acid-templated transcription (GO:1903506)	619	109	157.02	-	.69	1.29E-04	9.69E-03
regulation of transcription, DNA-templated (GO:0006355)	614	108	155.75	-	.69	1.48E-04	1.08E-02
peptide transport (GO:0015833)	678	118	171.99	-	.69	3.25E-05	3.79E-03
intracellular transport (GO:0046907)	672	116	170.46	-	.68	2.44E-05	3.13E-03
protein transport (GO:0015031)	670	115	169.96	-	.68	2.33E-05	3.14E-03
positive regulation of gene expression (GO:0010628)	417	70	105.78	-	.66	6.47E-04	3.37E-02
positive regulation of nucleobase-containing compound metabolic process (GO:0045935)	400	66	101.47	-	.65	5.05E-04	2.71E-02
positive regulation of RNA metabolic process (GO:0051254)	379	62	96.14	-	.64	7.04E-04	3.56E-02
macromolecule catabolic process (GO:0009057)	424	69	107.55	-	.64	2.30E-04	1.49E-02
regulation of transcription by RNA polymerase II (GO:0006357)	461	75	116.94	-	.64	1.28E-04	9.89E-03
organonitrogen compound catabolic process (GO:1901565)	377	61	95.63	-	.64	5.39E-04	2.86E-02
protein localization to organelle (GO:0033365)	421	68	106.79	-	.64	2.15E-04	1.43E-02
positive regulation of RNA biosynthetic process (GO:1902680)	359	57	91.07	-	.63	4.02E-04	2.25E-02
positive regulation of nucleic acid-templated transcription (GO:1903508)	359	57	91.07	-	.63	4.02E-04	2.22E-02
cellular macromolecule catabolic process (GO:0044265)	402	63	101.97	-	.62	1.21E-04	9.60E-03
positive regulation of transcription, DNA-templated (GO:0045893)	353	55	89.54	-	.61	3.45E-04	1.95E-02
positive regulation of transcription by RNA polymerase II (GO:0045944)	304	47	77.11	-	.61	7.83E-04	3.84E-02
establishment of protein localization to organelle (GO:0072594)	330	50	83.71	-	.60	2.79E-04	1.71E-02
proteolysis (GO:0006508)	349	48	88.53	-	.54	1.41E-05	2.25E-03
mRNA metabolic process (GO:0016071)	309	42	78.38	-	.54	3.78E-05	4.32E-03
modification-dependent macromolecule catabolic process (GO:0043632)	247	32	62.66	-	.51	9.53E-05	8.49E-03
RNA biosynthetic process (GO:0032774)	239	30	60.63	-	.49	7.07E-05	6.76E-03
protein catabolic process (GO:0030163)	273	34	69.25	-	.49	1.59E-05	2.39E-03
modification-dependent protein catabolic process (GO:0019941)	225	28	57.08	-	.49	1.15E-04	9.43E-03
cellular protein catabolic process (GO:0044257)	266	33	67.48	-	.49	2.33E-05	3.06E-03
proteolysis involved in cellular protein catabolic process (GO:0051603)	247	30	62.66	-	.48	3.21E-05	3.84E-03
vesicle-mediated transport (GO:0016192)	404	48	102.48	-	.47	2.57E-08	7.12E-06
nucleic acid-templated transcription (GO:0097659)	235	27	59.61	-	.45	1.92E-05	2.72E-03
transcription, DNA-templated (GO:0006351)	235	27	59.61	-	.45	1.92E-05	2.65E-03
ubiquitin-dependent protein catabolic process (GO:0006511)	219	25	55.55	-	.45	3.00E-05	3.66E-03
Golgi vesicle transport (GO:0048193)	195	22	49.47	-	.44	6.90E-05	6.84E-03
mRNA processing (GO:0006397)	205	21	52.00	-	.40	9.62E-06	1.58E-03
RNA splicing, via transesterification reactions (GO:0000375)	122	11	30.95	-	.36	2.69E-04	1.71E-02
RNA splicing (GO:0008380)	142	12	36.02	-	.33	2.61E-05	3.26E-03
mRNA splicing, via spliceosome (GO:0000398)	113	9	28.66	-	.31	1.41E-04	1.04E-02
RNA splicing, via transesterification reactions with bulged adenosine as nucleophile (GO:0000377)	114	9	28.92	-	.31	9.88E-05	8.65E-03
response to organonitrogen compound (GO:0010243)	81	6	20.55	-	.29	1.06E-03	4.77E-02
mRNA transport (GO:0051028)	97	7	24.61	-	.28	1.86E-04	1.30E-02
vesicle organization (GO:0016050)	89	6	22.58	-	.27	2.53E-04	1.62E-02
transcription by RNA polymerase II (GO:0006366)	157	10	39.83	-	.25	2.52E-07	5.51E-05
response to endoplasmic reticulum stress (GO:0034976)	79	4	20.04	-	.20	9.34E-05	8.46E-03
regulation of intracellular transport (GO:0032386)	43	1	10.91	-	.09	1.01E-03	4.57E-02
organelle membrane fusion (GO:0090174)	44	1	11.16	-	.09	6.56E-04	3.38E-02
protein lipidation (GO:0006497)	49	1	12.43	-	.08	2.77E-04	1.73E-02
lipoprotein biosynthetic process (GO:0042158)	49	1	12.43	-	.08	2.77E-04	1.71E-02
lipoprotein metabolic process (GO:0042157)	50	1	12.68	-	.08	2.95E-04	1.76E-02
membrane fusion (GO:0061025)	53	1	13.44	-	.07	1.16E-04	9.39E-03
intra-Golgi vesicle-mediated transport (GO:0006891)	33	0	8.37	-	< 0.01	8.15E-04	3.93E-02
vesicle fusion (GO:0006906)	40	0	10.15	-	< 0.01	2.10E-04	1.45E-02

## Sheet: CC
Analysis Type:	PANTHER Overrepresentation Test (Released 20200728)
Annotation Version and Release Date:	GO Ontology database DOI: 10.5281/zenodo.4033054 Released 2020-09-10
Analyzed List:	ALL_verified.txt (Saccharomyces cerevisiae)
Reference List:	background_ref_only_verified.txt (Saccharomyces cerevisiae)
Test Type:	FISHER
Correction:	FDR
GO cellular component complete	background_ref_only_verified.txt - REFLIST (5113)	ALL_verified.txt (1297)	ALL_verified.txt (expected)	ALL_verified.txt (over/under)	ALL_verified.txt (fold Enrichment)	ALL_verified.txt (raw P-value)	ALL_verified.txt (FDR)
cytosolic large ribosomal subunit (GO:0022625)	85	78	21.56	+	3.62	1.13E-15	2.02E-13
cytosolic ribosome (GO:0022626)	158	134	40.08	+	3.34	3.86E-24	4.15E-21
cytosolic small ribosomal subunit (GO:0022627)	65	55	16.49	+	3.34	2.01E-10	1.66E-08
large ribosomal subunit (GO:0015934)	131	102	33.23	+	3.07	1.22E-16	2.63E-14
ribosomal subunit (GO:0044391)	230	164	58.34	+	2.81	1.32E-23	7.09E-21
ribosome (GO:0005840)	253	169	64.18	+	2.63	4.61E-22	1.65E-19
preribosome, large subunit precursor (GO:0030687)	62	41	15.73	+	2.61	4.98E-06	2.68E-04
small ribosomal subunit (GO:0015935)	99	62	25.11	+	2.47	7.33E-08	5.26E-06
preribosome (GO:0030684)	169	104	42.87	+	2.43	4.53E-12	6.10E-10
90S preribosome (GO:0030686)	90	52	22.83	+	2.28	6.33E-06	2.96E-04
nuclear replication fork (GO:0043596)	44	25	11.16	+	2.24	2.17E-03	4.67E-02
small-subunit processome (GO:0032040)	52	29	13.19	+	2.20	1.14E-03	2.62E-02
ribonucleoprotein complex (GO:1990904)	548	264	139.01	+	1.90	1.02E-18	2.74E-16
fungal-type cell wall (GO:0009277)	126	58	31.96	+	1.81	2.52E-04	8.48E-03
external encapsulating structure (GO:0030312)	131	58	33.23	+	1.75	6.13E-04	1.65E-02
cell wall (GO:0005618)	131	58	33.23	+	1.75	6.13E-04	1.61E-02
nucleolus (GO:0005730)	288	119	73.06	+	1.63	7.35E-06	3.30E-04
intracellular non-membrane-bounded organelle (GO:0043232)	1395	481	353.87	+	1.36	9.47E-12	1.13E-09
non-membrane-bounded organelle (GO:0043228)	1395	481	353.87	+	1.36	9.47E-12	1.02E-09
intracellular (GO:0005622)	4831	1193	1225.47	-	.97	1.05E-03	2.47E-02
intracellular membrane-bounded organelle (GO:0043231)	4000	906	1014.67	-	.89	5.12E-10	3.94E-08
membrane-bounded organelle (GO:0043227)	4060	913	1029.89	-	.89	1.30E-11	1.27E-09
membrane (GO:0016020)	1829	377	463.96	-	.81	5.30E-06	2.72E-04
catalytic complex (GO:1902494)	724	130	183.65	-	.71	6.70E-05	2.57E-03
envelope (GO:0031975)	587	105	148.90	-	.71	3.67E-04	1.13E-02
organelle envelope (GO:0031967)	587	105	148.90	-	.71	3.67E-04	1.10E-02
endoplasmic reticulum (GO:0005783)	602	107	152.71	-	.70	2.38E-04	8.27E-03
nuclear outer membrane-endoplasmic reticulum membrane network (GO:0042175)	388	63	98.42	-	.64	4.13E-04	1.14E-02
bounding membrane of organelle (GO:0098588)	602	97	152.71	-	.64	5.30E-06	2.59E-04
whole membrane (GO:0098805)	541	87	137.23	-	.63	1.70E-05	7.31E-04
endoplasmic reticulum membrane (GO:0005789)	374	60	94.87	-	.63	4.08E-04	1.16E-02
organelle membrane (GO:0031090)	1198	192	303.89	-	.63	4.29E-12	6.59E-10
endomembrane system (GO:0012505)	1021	162	258.99	-	.63	1.62E-10	1.45E-08
membrane protein complex (GO:0098796)	328	48	83.20	-	.58	1.18E-04	4.24E-03
Golgi apparatus (GO:0005794)	287	42	72.80	-	.58	4.03E-04	1.17E-02
intrinsic component of organelle membrane (GO:0031300)	210	30	53.27	-	.56	1.79E-03	3.93E-02
vesicle (GO:0031982)	295	34	74.83	-	.45	1.37E-06	7.74E-05
cytoplasmic vesicle (GO:0031410)	289	33	73.31	-	.45	1.12E-06	7.06E-05
intracellular vesicle (GO:0097708)	289	33	73.31	-	.45	1.12E-06	6.67E-05
endosome (GO:0005768)	179	14	45.41	-	.31	6.44E-07	4.33E-05
actin cytoskeleton (GO:0015629)	83	6	21.05	-	.28	7.44E-04	1.82E-02
cortical actin cytoskeleton (GO:0030864)	72	5	18.26	-	.27	1.44E-03	3.22E-02
cortical cytoskeleton (GO:0030863)	75	5	19.03	-	.26	6.90E-04	1.73E-02
endosome membrane (GO:0010008)	95	6	24.10	-	.25	8.46E-05	3.14E-03
spliceosomal complex (GO:0005681)	99	6	25.11	-	.24	4.04E-05	1.61E-03
actin cortical patch (GO:0030479)	58	2	14.71	-	.14	2.77E-04	9.03E-03
endocytic patch (GO:0061645)	59	2	14.97	-	.13	2.93E-04	9.26E-03
vesicle tethering complex (GO:0099023)	43	1	10.91	-	.09	1.01E-03	2.41E-02
coated vesicle membrane (GO:0030662)	45	1	11.42	-	.09	6.56E-04	1.68E-02
SWI/SNF superfamily-type complex (GO:0070603)	60	1	15.22	-	.07	3.31E-05	1.37E-03

## Sheet: MF
Analysis Type:	PANTHER Overrepresentation Test (Released 20200728)
Annotation Version and Release Date:	GO Ontology database DOI: 10.5281/zenodo.4033054 Released 2020-09-10
Analyzed List:	ALL_verified.txt (Saccharomyces cerevisiae)
Reference List:	background_ref_only_verified.txt (Saccharomyces cerevisiae)
Test Type:	FISHER
Correction:	FDR
GO molecular function complete	background_ref_only_verified.txt - REFLIST (5113)	ALL_verified.txt (1297)	ALL_verified.txt (expected)	ALL_verified.txt (over/under)	ALL_verified.txt (fold Enrichment)	ALL_verified.txt (raw P-value)	ALL_verified.txt (FDR)
structural constituent of ribosome (GO:0003735)	221	159	56.06	+	2.84	3.46E-23	8.69E-20
rRNA binding (GO:0019843)	79	48	20.04	+	2.40	5.27E-06	4.41E-03
structural molecule activity (GO:0005198)	340	190	86.25	+	2.20	2.71E-18	3.40E-15
RNA binding (GO:0003723)	602	214	152.71	+	1.40	9.00E-06	5.65E-03
hydrolase activity (GO:0016787)	920	174	233.37	-	.75	7.14E-05	2.56E-02
protein binding (GO:0005515)	853	156	216.38	-	.72	2.80E-05	1.41E-02
catalytic activity, acting on a protein (GO:0140096)	518	84	131.40	-	.64	3.85E-05	1.61E-02
